# Supplementary material
Source: HighWire-hosted journal article supplement (https://erj.ersjournals.com/content/61/3/2201486)

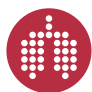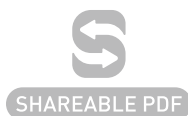

# Respiratory effort during sleep and prevalent hypertension in obstructive sleep apnoea

Jean-Benoit Martinot <sup>1,2</sup>, Nhat-Nam Le-Dong<sup>3</sup>, Atul Malhotra<sup>4</sup> and Jean-Louis Pépin<sup>5</sup>

<sup>1</sup>Sleep Laboratory, CHU Université Catholique de Louvain (UCL) Namur Site Sainte-Elisabeth, Namur, Belgium. <sup>2</sup>Institute of Experimental and Clinical Research, UCL Bruxelles Woluwe, Brussels, Belgium. <sup>3</sup>Sunrise, Namur, Belgium. <sup>4</sup>Division of Pulmonary, Critical Care, and Sleep Medicine, Department of Medicine, University of California San Diego, La Jolla, CA, USA. <sup>5</sup>HP2 Laboratory, Inserm U1300, University Grenoble Alpes, Grenoble, France.

Corresponding author: Jean-Benoit Martinot ([martinot.j@respisom.be](mailto:martinot.j@respisom.be))

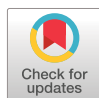

Shareable abstract (@ERSpublications)

The proportion of sleep time spent with increased respiratory effort automatically derived from mandibular jaw movements was a better predictor of prevalent hypertension in patients with OSA than traditional PSG metrics (e.g. AHI) <http://bit.ly/3TWE08j>

**Cite this article as:** Martinot J-B, Le-Dong N-N, Malhotra A, *et al.* Respiratory effort during sleep and prevalent hypertension in obstructive sleep apnoea. *Eur Respir J* 2023; 61: 2201486 [DOI: 10.1183/13993003.01486-2022].

This single-page version can be shared freely online.

Copyright ©The authors 2023.

This version is distributed under the terms of the Creative Commons Attribution Non-Commercial Licence 4.0. For commercial reproduction rights and permissions contact [permissions@ersnet.org](mailto:permissions@ersnet.org)

This article has an editorial commentary:  
<https://doi.org/10.1183/13993003.02421-2022>

Received: 25 July 2022  
Accepted: 16 Nov 2022

## Abstract

**Background** Mechanisms underlying blood pressure changes in obstructive sleep apnoea (OSA) are incompletely understood. Increased respiratory effort is one of the main features of OSA and is associated with sympathetic overactivity, leading to increased vascular wall stiffness and remodelling. This study investigated associations between a new measure of respiratory effort (percentage of total sleep time spent with increased respiratory effort based on measurement of mandibular jaw movements (MJM): REMOV, %TST) and prevalent hypertension in adults referred for evaluation of suspected OSA.

**Methods** A machine learning model was built to predict hypertension from clinical data, conventional polysomnography (PSG) indices and MJM-derived parameters (including REMOV). The model was evaluated in a training subset and a test subset.

**Results** The analysis included 1127 patients: 901 (80%) in the training subset and 226 (20%) in the test subset. The prevalence of hypertension was 31% and 30%, respectively, in the training and test subsets. A risk stratification model based on 18 input features including REMOV had good accuracy for predicting prevalent hypertension (sensitivity 0.75 and specificity 0.83). Using the Shapley additive explanation method, REMOV was the best predictor of hypertension after clinical risk factors (age, sex, body mass index and neck circumference) and time with oxygen saturation <90%, ahead of standard PSG metrics (including the apnoea–hypopnoea index and oxygen desaturation index).

**Conclusion** The proportion of sleep time spent with increased respiratory effort automatically derived from MJM was identified as a potential new reliable metric to predict prevalent hypertension in patients with OSA.

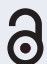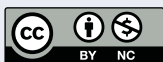

Supplement: inline-supplementary-material-2 [file inline-supplementary-material-2.pdf]
